# Supplementary material
Source: publisher figshare collection journal article supplement (https://tandf.figshare.com/ndownloader/files/14939666)
Supplement: Supplementary file 1 [file 14939666]

Appendix

Indeterminate fish remains (Teleostei indet.) from Bełchatów

in the palaeoichthyological collection of ZPALWr.

ZPALWr. BM/69 – dentary fragment

ZPALWr. BM/70 – opercular fragment

ZPALWr. BM/56–58, BM/63 – broken abdominal centra

ZPALWr. BM/29–31, BM/48–55, BM/61–62, BM/64–66, BM/80–83, BM/90–99, BM/103, BM/105, BM/115–130, ВМ/140–149 – small bone fragments and debris

ZPALWr. BM/113 – bone breccia sample
